# Supplementary material for: Measurement Invariance of the Satisfaction With Life Scale in South Korea
Source: Atypon-hosted journal article supplement (doi:10.1027/1015-5759/a000745), 2022-11-11
Supplement: 1015-5759_a000745_esm1.pdf [file 1015-5759_a000745_esm1.pdf]

## Electronic Supplementary Materials

The two translations are very similar, but use different words in some of the items. In addition, Translation 1 contains labels only for response options 1 and 7, whereas Translation 2 contains labels for all 7 response options (in conformity with the original English version of the SWLS).

### Translation 1 (prepared by 2020 Koreans' Happiness Survey team)

| 2-5 귀하는 다음의 각 항목에 대하여 얼마나 동의하십니까?       |             |   |   |   |   |   |           |
|-----------------------------------------|-------------|---|---|---|---|---|-----------|
| 항 목                                     | 전혀 동의<br>않음 |   |   |   |   |   | 매우<br>동의함 |
| (1) 전반적으로 나의 삶은 내가 생각하는 이상적인 삶에 가깝다.    | ①           | ② | ③ | ④ | ⑤ | ⑥ | ⑦         |
| (2) 나의 삶의 조건들은 훌륭하다.                    | ①           | ② | ③ | ④ | ⑤ | ⑥ | ⑦         |
| (3) 나는 나의 삶에 만족한다.                      | ①           | ② | ③ | ④ | ⑤ | ⑥ | ⑦         |
| (4) 나는 지금까지 살아오면서 내가 원했던 중요한 것들을 얻었다.   | ①           | ② | ③ | ④ | ⑤ | ⑥ | ⑦         |
| (5) 내가 인생을 다시 산다 해도 거의 아무것도 바꾸지 않을 것이다. | ①           | ② | ③ | ④ | ⑤ | ⑥ | ⑦         |

Obtained from:

<https://nafi.re.kr/new/bidding.do?mode=download&articleNo=1527&attachNo=12>

**Translation 2 (based on previous translations)**

다음의 각 문항에 대해 동의하는 정도에 따라 1-7점 척도로 평가해주시기 바랍니다.

- 1 = 전혀 동의하지 않음
- 2 = 어느정도 동의하지 않음
- 3 = 약간 동의하지 않음
- 4 = 동의도 동의하지 않는 것도 아님
- 5 = 약간 동의함
- 6 = 어느 정도 동의함
- 7 = 매우 동의함

1. 나는 대체로 내 이상에 가까운 생활을 하고 있다.
2. 현재 나는 아주 좋은 생활 조건들을 가지고 있다.
3. 나는 나의 삶에 대해 만족한다.
4. 나는 지금까지 내 삶에서 내가 원하는 중요한 것들을 가져 왔다.
5. 만약 내 삶을 다시 산다 하더라도, 나는 지금 까지의 삶처럼 살겠다.

*Note.* A team of students, bilinguals, and researchers (led by the author) translated several scales from English into Korean in 2015 for use in a research project. Among the translated scales was the SWLS. For the scales for which Korean translations were available (including the SWLS), the procedure was to find available Korean translations, compare them, and produce a final translation. The available translations were all found to be acceptable, and only minimal revisions were made to the wording of the items. This translation is based on some available translations such as (all in Korean):

Ahn S. N. (2006). The causal relationship between self-consistency and life satisfaction based on self-concept. (MA Thesis)

Kim, J. H. (2007). The relationship between life satisfaction and life expectancy, stress and well-being: Application of motivational state theory. *Journal of the Korean Psychological Association: Health*, 12(2), 325-345.

Ryu Y. J. (1996). The effect of personality and level of desire on subjective well-being. Yonsei University. (MA Thesis)
